1 **Reinforcing neuron extraction and spike inference in calcium**  
2 **imaging using deep self-supervised learning**

3 Xinyang Li<sup>1,2,3†</sup>, Guoxun Zhang<sup>1,3†</sup>, Jiamin Wu<sup>1,3</sup>, Yuanlong Zhang<sup>1,3</sup>, Zhifeng Zhao<sup>1,3</sup>,  
4 Xing Lin<sup>1,3,4</sup>, Hui Qiao<sup>1,3</sup>, Hao Xie<sup>1,3</sup>, Haoqian Wang<sup>2,3\*</sup>, Lu Fang<sup>3,5\*</sup> & Qionghai Dai<sup>1,3\*</sup>

5 *<sup>1</sup>Department of Automation, Tsinghua University, Beijing 100084, China*

6 *<sup>2</sup>Tsinghua Shenzhen International Graduate School, Tsinghua University, Shenzhen,*  
7 *518055, China*

8 *<sup>3</sup>Institute for Brain and Cognitive Science, Tsinghua University, Beijing 100084, China.*

9 *<sup>4</sup>Beijing Innovation Center for Future Chips, Tsinghua University, Beijing 100084,*  
10 *China*

11 *<sup>5</sup>Department of Electronic Engineering, Tsinghua University, Beijing 100084, China*

12 *<sup>†</sup>These authors contributed equally to this work.*

13 *\*Correspondence: wanghaoqian@tsinghua.edu.cn; fanglu@tsinghua.edu.cn;*

14 *qh dai@mail.tsinghua.edu.cn*

15 **ABSTRACT**

16 **Calcium imaging is inherently susceptible to detection noise especially when imaging with**  
17 **high frame rate or under low excitation dosage. We developed DeepCAD, a self-**  
18 **supervised learning method for spatiotemporal enhancement of calcium imaging without**  
19 **requiring any high signal-to-noise ratio (SNR) observations. Using this method, detection**  
20 **noise can be effectively suppressed and the imaging SNR can be improved more than**  
21 **tenfold, which massively improves the accuracy of neuron extraction and spike inference**  
22 **and facilitate the functional analysis of neural circuits.**

23 Calcium imaging enables parallel recordings of large neuronal ensembles in living animals<sup>1-4</sup>  
24 and offers a new possibility for deciphering information propagation, integration, and  
25 computation in neural circuits<sup>5</sup>. To obtain accurate neuron extraction and spike inference for  
26 downstream neuroscience analysis, high-SNR calcium imaging is desired. However, due to the  
27 paucity of fluorescence photons caused by low peak accumulations and fast dynamics of *in*  
28 *vivo* calcium transients<sup>6,7</sup>, calcium imaging is easy to be contaminated by detection noise (*i.e.*  
29 photon shot noise and electronic noise), especially in functional imaging where high temporal  
30 resolution is particularly important for analyzing neural activities<sup>8</sup>.

31 To capture sufficient fluorescence photons for high-SNR calcium imaging, the most direct  
32 way is to use high excitation dosage, but concurrent photobleaching, phototoxicity<sup>9,10</sup>, and  
33 tissue heating<sup>11</sup> are detrimental for sample health and photosensitive biological processes,  
34 which limits the maximal excitation power for long-term *in vivo* imaging<sup>12</sup>. More effective

35 strategies include using brighter calcium indicators<sup>7,13</sup> and more sensitive photoelectric  
36 detectors<sup>14</sup>, but their performances are still largely restricted in photon-limited conditions such  
37 as dendritic imaging and deep-tissue imaging. Apart from these physical or biological  
38 approaches, data-driven methods are promising to offer an alternative solution to recover  
39 faithful signals from degraded recordings and reduce the photon budget of calcium imaging.  
40 As an intelligent signal processing technique, deep learning has been adopted by microscopists  
41 and achieved impressive performance in fluorescence imaging<sup>15-18</sup>. However, calcium  
42 transients are highly dynamic, non-repetitive activities and a firing pattern cannot be  
43 captured twice. Previous schemes for obtaining ground-truth images (*i.e.* clean images  
44 without noise contamination or high-SNR images with the same underlying scene) by  
45 extending integration time or averaging multiple noisy frames are no longer feasible,  
46 posing an entrenched obstacle for conventional supervised learning methods.

47 In this paper, we present DeepCAD, a self-supervised learning method for calcium imaging  
48 denoising by over tenfold SNR improvement without requiring any high-SNR observations for  
49 training. DeepCAD is based on the insight that a deep neural network can converge to a mean  
50 estimator even the target image used for training is another corrupted sampling of the same  
51 scene<sup>19</sup>. When looking at calcium imaging data, we explored the temporal redundancy of  
52 pervasive video-rate imaging and found that any two consecutive frames can be regarded as  
53 two independent samplings of the same underlying firing pattern, which can be used for  
54 training of denoising models. Furthermore, the input and output data are designed to be  
55 3D volumes rather than 2D frames to fully exploit spatiotemporal information in the

56 time-lapse stack. We show that such a 3D self-supervised method is extremely effective for  
57 calcium imaging denoising and even the subtlest calcium fluctuations induced by a single  
58 action potential (AP) can be restored from severely corrupted images. Finally, a Fiji-based  
59 plugin along with a pre-trained model were released to make our method easy to access and  
60 convenient to use.

61 The general principle of DeepCAD is schematized in Fig. 1a. For network architecture, we  
62 employed 3D U-Net<sup>20</sup> to aggregate spatiotemporal information in multiple frames using  
63 3D convolutional layers (Supplementary Fig. 1, Methods), which endows DeepCAD with  
64 better denoising capability than 2D architecture or classical methods (Supplementary Fig. 2).  
65 Benefiting from the self-supervised strategy, a single low-SNR stack of ~3500 frames is  
66 sufficient to be a complete training set. To generate the training set, two sub-stacks consisting  
67 of interlaced frames were split from the original low-SNR stack and 3D tiles were extracted  
68 from these sub-stacks for training (Supplementary Fig. 3). They contain approximate identical  
69 calcium transients when the original stack was imaged at near video rate, which is common for  
70 commercial or customized microscopes. After proper training, interpretable features can be  
71 learned (Supplementary Fig. 4) and the model can be applied to subsequent acquisitions  
72 without extra training (Fig. 1b). Although the network was trained on specified spatial and  
73 temporal resolution, we found that it had non-inferior performance on various frame rates  
74 (Supplementary Fig. 5) and magnifications (Supplementary Fig. 6), indicating the great  
75 scalability and generalization for versatile applications of DeepCAD.

76 To quantitatively evaluate the performance of DeepCAD, we first validated it on simulated  
77 calcium imaging data of different imaging SNRs (Supplementary Figs. 7-8 and Supplementary  
78 Notes 1-2), which contains synchronous noise-free recordings as the ground truth for  
79 comparison. The constrained nonnegative matrix factorization (CNMF) algorithm<sup>21</sup> was  
80 used for downstream neuron extractions (Methods). After the enhancement of  
81 DeepCAD, more active neurons can be detected, especially when imaging SNR is low  
82 (Fig. 1c). The accuracy of neuron extraction was also quantified with F1 score and  
83 significant improvement was observed across a wide range of intersection-over-union (IoU)  
84 thresholds (Fig. 1d,e). For a typical IoU threshold of 0.7, the segmentation accuracy was  
85 improved by 2.4 folds (0.84 contrast to 0.35). Benefiting from the improved imaging  
86 quality, calcium traces extracted from the denoised data possess higher fidelity. To  
87 investigate the temporal enhancement of DeepCAD, we extracted calcium traces of all  
88 neurons from both raw noisy data and the enhanced counterpart. The Pearson  
89 correlation with the clean traces was significantly improved after denoising (Fig. 1f).  
90 Even the slightest calcium transients can be restored from the original noisy data (Fig.  
91 1g and Supplementary Fig. 9). These facts suggest that the spatiotemporal enhancement  
92 of DeepCAD can improve the accuracy of neuronal localization and trace extraction  
93 and largely facilitate the analysis of neural circuits.

94 To verify the effectiveness and reliability of DeepCAD on neuroscience research, we then  
95 demonstrated its performance on two-photon calcium imaging based on data released by  
96 Svoboda lab<sup>7</sup>. In this dataset, simultaneous cell-attached electrophysiological recordings (Fig.

97 2a) are synchronized with two-photon imaging and serve as the reference of calcium transients  
98 and the ground truth of spike inference. Contaminated by detection noise, both the spatial  
99 footprint and temporal traces of the neuron were severely corrupted in the original data (Fig.  
100 2b). After we applied DeepCAD to enhance these data, the annular cytoplasm became  
101 recognizable and calcium traces were liberated from noise (Fig. 2c and Supplementary Video  
102 1). Even the most imperceptible calcium transients evoked by one AP, two APs, and three APs  
103 were clearly distinguished and still maintain their original dynamics (Fig. 2d-g), which  
104 otherwise would be submerged in noise. For further comparison, we extracted single-pixel  
105 fluorescence from cytoplasmic pixels and found that calcium transients can be unveiled at a  
106 single-pixel scale (Supplementary Fig. 10). Moreover, we performed spike inference (Methods)  
107 on traces extracted from the original data as well as the corresponding denoised data. Owing to  
108 the improvement of imaging SNR, the error rate of spike inference was consequently decreased  
109 (Fig. 2h and Supplementary Fig. 11). Among 107 independent calcium traces, 86% of them  
110 were observed to have lower error rates.

111 Next, we employed DeepCAD for noise removal of calcium imaging of large neuronal  
112 populations in awake mice. To obtain high-SNR recordings for validation of our method, we  
113 designed and built a two-photon imaging system with the capability of simultaneous low-SNR  
114 and high-SNR recording (Supplementary Fig. 12 and Methods). The high-SNR detection path  
115 was strictly synchronized with the low-SNR detection path but with about 10-fold higher  
116 imaging SNR (Supplementary Fig. 13), which can be used as the reference for our denoising  
117 results. We first imaged spontaneous neuropil activities in cortical layer 1 of a transgenic mouse

118 expressing GCaMP6f and found that calcium fluctuations indiscernible in original low-SNR  
119 recordings can be effectively recovered by DeepCAD (Fig. 3a-c and Supplementary Video 2).  
120 The imaging SNR was improved more than 10 folds considering that the SNR of enhanced  
121 recordings even surpasses corresponding high-SNR reference. Fluorescence traces of dendritic  
122 pixels can be accurately resolved and keep high consistency with the high-SNR reference (Fig.  
123 3d-e and Supplementary Fig. 14). We also applied DeepCAD to enhance calcium imaging of  
124 somatic signals. After denoising, neuronal distribution and circuit dynamics can be recognized  
125 from a single frame (Fig. 3f-h and Supplementary Video 3). Using CNMF as the downstream  
126 source extraction method, 52.6% (229 contrast to 150) more active neurons can be extracted  
127 (Fig. 3i,j and Supplementary Fig. 15) and the trace peak SNR of extracted neurons was also  
128 improved more than two folds (9.9 contrast to 4.8, median value) (Fig. 3k), indicating that the  
129 functional analysis of large neuronal populations can be effectively strengthened due to  
130 improved SNR.

131 In summary, we demonstrate DeepCAD, a deep self-supervised learning-based method for  
132 spatiotemporal enhancement of calcium imaging. Quantitative evaluation on both simulated  
133 and experimental data shows that the accuracy of neuron extraction and spike inference can be  
134 largely reinforced after denoising. To fully evaluate the capability and reliability of our method,  
135 a customized two-photon microscope was built to capture synchronized low-SNR and high-  
136 SNR recordings, which indicates that DeepCAD enables a more than tenfold improvement in  
137 imaging SNR. To maximize its accessibility, we released an open-source Fiji plugin  
138 (Supplementary Fig. 16 and Supplementary Notes 3) and a pre-trained DeepCAD model for

139 two-photon imaging of neuron populations. Our method can be efficiently configured on a  
140 common desktop and achieve comparable performance on different imaging systems  
141 regardless of objectives and detectors (Supplementary Fig. 17 and Supplementary Video 4).  
142 Although DeepCAD is currently investigated only on two-photon microscopy, it can be easily  
143 extended to other imaging modalities such as wide-field microscopy and light-sheet  
144 microscopy. We anticipate that this method could serve as a general processing step for calcium  
145 imaging in photon-limited conditions and promote long-term and high-fidelity recording of  
146 neural activities.



## 147 **Methods**

148 **Optical setup.** A two-photon imaging system was designed to capture strictly  
149 synchronized low-SNR and high-SNR calcium recordings for validation of our method.  
150 Our system was based on a standard two-photon laser scanning microscope (2PLSM)  
151 and the detection path was specially designed to split the fluorescence in a ratio of 1:10.  
152 All components of our imaging system are commercially available or easy to fabricate.  
153 The schematic of the custom-built two-photon microscope is shown in Supplementary  
154 Fig. 12. At the forefront of the optical path, a titanium-sapphire laser system with tunable  
155 wavelength (Mai Tai HP, Spectra-Physics) was used as the illumination source to emit  
156 the linearly polarized, femtosecond-pulsed Gaussian excitation beam (920 nm central  
157 wavelength, pulse width <100 fs, 80 MHz repetition rate). A half-wave plate  
158 (AQWP10M-980, Thorlabs) was used to adjust the polarization of the laser beam. Then  
159 the laser beam went through an electro-optic modulator (350-80LA-02, Conoptics) to  
160 modulate the excitation power and the half-wave plate was rotated to make the electro-  
161 optic modulator have maximal extinction ratio. A 4f system composed of two  
162 achromatic lenses (AC508-200-B, Thorlabs) with the same focal length was followed  
163 to collimate the laser beam. Another 4f system (AC508-100-B and AC508-400-B,  
164 Thorlabs) with a fourfold magnification was used to expand the laser beam and guide  
165 the beam into a galvo-resonant scanner (8315K/CRS8K, Cambridge Technology) for  
166 fast optical scanning. The scanner mount was optimally designed for reliable and  
167 distortion-free scanning. Then the beam went through a scan lens (SL50-2P2, Thorlabs)

168 and a tube lens (TTL200MP, Thorlabs) and converged into a tight focus through a high  
169 numerical aperture (NA) water-dipping objective (25×/1.05 NA, XLPLN25XWMP2,  
170 Olympus). A high-precision piezo actuator (P-725, Physik Instrumente) was  
171 additionally used to drive the objective for fast axial scanning. The beam size at the  
172 back aperture of the objective was further restricted with an iris set behind the beam  
173 expander (L4) to keep the back aperture of the objective underfilled. The effective  
174 excitation NA was about 0.5 in our imaging experiments.

175 For the detection path, fluorescence excited by the Gaussian focus was first  
176 collected by the objective. High-NA detection is helpful to detect more fluorescence  
177 photons and improve the signal intensity. A long-pass dichroic mirror (DMLP650L,  
178 Thorlabs) was used to separate fluorescence by reflecting the fluorescence signals and  
179 transmitting the excitation light. A 1:9 (reflectance: Transmission) non-polarizing plate  
180 beam splitter (BSN10, Thorlabs) was then placed in the detection path. All fluorescence  
181 going through the beam splitter will be split into a 10% component (low-SNR path) and  
182 a 90% component (high-SNR path), propagating in two orthogonal directions and  
183 detected by two photomultiplier tubes (PMT1001, Thorlabs). A pair of fluorescence  
184 filters (MF525-39, Thorlabs; ET510/80M, Chroma) was configured in front of each  
185 PMT to fully block wavelengths outside the emission passband of green fluorescent  
186 protein (GFP). To improve detection efficiency, we conjugated the back aperture of the  
187 objective to the sensor planes of the two PMTs using two 4f systems (TTL200-A and  
188 AC254-050-A, Thorlabs). The two detection paths recorded synchronized fluorescence

189 signals but with quite different imaging SNR. Although the high-SNR recording still  
190 suffers from noise, it can be used as the reference to identify underlying structures and  
191 calcium fluctuations. The field-of-view (FOV) of our two-photon imaging system is  
192 about 600  $\mu\text{m}$  and the frame rate is about 30 Hz.

193 **System calibration.** To confirm the fluorescence intensity ratio between the high-SNR  
194 detection path and the low-SNR detection path, we imaged 1  $\mu\text{m}$  green-fluorescent  
195 beads (G0100, ThermoFisher) for system calibration. The beads suspension was first  
196 diluted and embedded in 1.0% agarose and then mounted on a microscope slide to form  
197 a single beads layer composed of sparse beads. A specified region was continuously  
198 scanned to acquire 500 consecutive frames. These frames can be regarded as  
199 independent samplings of the same underlying scene. To reduce the impact of detection  
200 noise, we averaged these frames to obtain the noise-free image of each path  
201 (Supplementary Fig. 13). All beads in the FOV were manually segmented and the  
202 intensity of each bead was calculated by averaging all pixels inside its segmentation  
203 mask. According to our statistical analysis, the fluorescence intensity of the high-SNR  
204 detection path was approximately tenfold higher than that of the low-SNR detection  
205 path.

206 **Mouse preparation and calcium imaging.** All experiments involving mice were  
207 performed in accordance with institutional guidelines for animal welfare and have been  
208 approved by the Institutional Animal Care and Use Committee (IACUC) of Tsinghua  
209 University.

210 Adult transgenic mice (Ai148D/Rasgrf2-dCre) at 8-12 postnatal weeks were  
211 anesthetized with 1.5% isoflurane and craniotomy surgeries were conducted using a  
212 stereotaxic instrument (68018, RWD Life Science) under a bright-field binocular  
213 microscope (77001S, RWD Life Science). A custom-made coverslip fitting the shape  
214 of the cranial window (~6 mm in diameter) was embedded and cemented to the skull.  
215 A biocompatible titanium headpost was then cemented to the skull for stable head  
216 fixation. The edge of the cranial window was enclosed with dental cement to hold the  
217 immersion water of the objective. After the surgery, 0.25mg/g body weight of  
218 Trimethoprim (TMP) was intraperitoneally injected to induce the expression of  
219 GCaMP6f genetically encoded calcium indicator (GECI) in layer 2/3 neurons across  
220 the whole brain. To reduce potential inflammation, 5 mg/kg body weight of Ketoprofen  
221 was injected subcutaneously. Each mouse was housed in a separate cage for 1-2 weeks  
222 of postoperative recovery.

223 Imaging experiments were carried out when the cranial window became clear and  
224 no inflammation occurred. Mice were first rapidly anesthetized with 3.0% isoflurane  
225 and then fixed onto a custom-made holder with the headpost. The mouse holder was  
226 mounted on a precision translation stage with three motorized axes (M-VP-25XA-  
227 XYZL, Newport) to find the region of interest (ROI) for imaging. The correction ring  
228 of the objective was adjusted to compensate for the coverslip thickness and eliminate  
229 spherical aberrations. The excitation power after the objective was kept below 140 mW  
230 in all experiments to avoid potential laser-induced tissue damage. Gaseous anesthesia

231 was switch off and the mice kept awake during the whole imaging process.

232 **Network architecture and training details.** The network architecture of DeepCAD  
233 employs 3D U-Net, which is reported to have superior performance on the segmentation  
234 of volumetric data<sup>20</sup>. In general, the network is composed of a 3D encoder module (the  
235 contracting path), a 3D decoder module (the expanding path), and three skip  
236 connections from the encoder module to the decoder module (Supplementary Fig. 1). In  
237 the 3D encoder module, there are three encoder blocks. Each block consists of two  
238  $3\times 3\times 3$  convolutional layers followed by a leaky rectified linear unit (LeakyReLU) and  
239 a  $2\times 2\times 2$  max pooling with strides of two in three dimensions. In the decoder module,  
240 there are three decoder blocks, each of which contains two  $3\times 3\times 3$  convolutional layers  
241 followed by a LeakyReLU and a 3D nearest interpolation. A group normalization<sup>22</sup>  
242 layer is configured after each convolutional layer. The skip connections link low-level  
243 features and high-level features by concatenating their feature maps. All operations  
244 (convolutions, max poolings, and interpolations) in the network are in 3D to aggregate  
245 spatial information and temporal information. For the loss function, we used the  
246 arithmetic average of a L1-norm loss term and a L2-norm loss term. The model was  
247 trained on 3D tiles with a spatial size of  $64\times 64$  pixels and a temporal size of 300 frames.  
248 Small spatial size can lower memory requirements and reduce the training time, and  
249 large temporal size is helpful to make full use of temporal information.

250 Adam optimizer<sup>23</sup> was used for network training with a learning rate of 0.00005 and  
251 exponential decay rates of 0.5 for the first moment and 0.9 for the second moment. We

252 used Graphics Processing Units (GPU) to accelerate the training and test process. It  
253 took about 12 hours to train our model for 20 epochs on a typical training set (about  
254 1200 3D tiles) with a single GPU (Nvidia TITAN RTX, 24 GB memory). Training time  
255 can be further shortened by using a more powerful GPU or parallelizing the training  
256 process on multiple GPUs.

257 The full 3D architecture of DeepCAD makes it easy to overfit because 3D  
258 convolutions usually involve more parameters than the 2D counterpart. The best  
259 denoising performance is only achieved at the point where there is neither underfitting  
260 nor overfitting. To screen out the model with the best generalization ability, we saved  
261 the network snapshot after each training epoch and evaluated its performance on a  
262 holdout validation set. We fed the validation data into each model and calculated the  
263 standard deviation projection of the output stack of each model. Then, the average pixel  
264 intensity was calculated on a small dark region (*e.g.* blood vessels or a small region  
265 without neural activity during the recording) of all standard deviation projections. The  
266 best model was selected to be the one with the smallest dark standard deviation.

267 **Data simulation.** Our simulation program includes a step for synthesizing the noise-  
268 free video (ground truth) and a step for adding the Mixed Poisson-Gaussian (MPG)  
269 noise (Supplementary Notes 1-2). Firstly, to generate realistic simulated calcium imaging  
270 data, we constructed a neuron library containing the spatial profiles of 517 neurons.  
271 These neurons were extracted using the constrained nonnegative matrix factorization  
272 algorithm<sup>21</sup> (CNMF) from an experimentally obtained two-photon calcium imaging

273 data of a virus-transfected wild-type mouse expressing GCaMP6f (layer 2/3 at the  
274 primary somatosensory cortex). For the spatial component that defines the location of  
275 each neuron, 120 neurons were randomly selected from the library to keep the sparsity  
276 of neurons. For the temporal component that defines the fluorescence fluctuations of  
277 each neuron, MLspike<sup>24</sup> was employed to generate calcium traces with GCaMP6f  
278 kinetics. Then, these two components were reshaped into 2D matrices and the simulated  
279 noise-free data (1  $\mu\text{m}/\text{pixel}$  spatial sampling rate, 30 Hz frame rate) was synthesized as  
280 the product of the spatial matrix and the temporal matrix. The noise-contaminated  
281 counterpart was ultimately generated by adding the content-related MPG noise. Data  
282 with different imaging SNRs were simulated with different relative photon numbers.  
283 Their relationship was investigated in Supplementary Fig. 7. All images were saved as  
284 uncompressed tif files with the format of unsigned 16-bit integer (uint16). More details  
285 of data simulation and related mathematical models are described in Supplementary  
286 Notes 1-2.

287 **Single-neuron recordings.** The data of simultaneous two-photon imaging and  
288 electrophysiological recordings of single-neuron activities were released by the  
289 Svoboda lab<sup>25</sup> and were downloaded from the Collaborative Research in Computational  
290 Neuroscience (CRCNS) platform. Only recordings of GCaMP6f neurons were used in  
291 this study. The image stacks were fourfold downsampled to reduce the sampling rate  
292 and some outlier recordings with very sparse spikes and low electrophysiological SNR  
293 were excluded. Fluorescence traces were extracted from temporal stacks using

294 manually annotated cytoplasmic masks. For spike inference, we used the MLspike  
295 algorithm<sup>24</sup>, which was reported to rank first in the *Spikefinder* challenge<sup>26</sup>. All traces  
296 were divided by their mean values for normalization before fed into the spike inference  
297 pipeline. Recommended model parameters for GCaMP6f indicator were used to ensure  
298 optimal performance of spike inference.

299 **Data analysis of neuronal populations.** Calcium imaging data of large neuronal  
300 populations were first registered with a non-rigid motion correction method<sup>27</sup> and the  
301 black edges of registered images were clipped. Then, CNMF<sup>21</sup> was employed as the  
302 source extraction method for neuron segmentation and trace extraction. A spatial matrix  
303 and a temporal matrix can be obtained from each video, storing the spatial footprints  
304 and corresponding calcium traces of all active neurons, respectively. The same set of  
305 parameters was used for the original low-SNR recording and corresponding DeepCAD  
306 enhanced counterpart, as well as the high-SNR recording. Simulated data were analyzed  
307 following the same pipeline except motion correction. Along with automatic neuron  
308 extraction, we also performed manual annotations to inspect our results. High-SNR  
309 recordings were tenfold downsampled along the time axis by averaging each  
310 consecutive ten frames, which reduced the disturbance of detection noise and was  
311 helpful to improve annotation accuracy. Boundaries of all active components were  
312 annotated using the ROI Manager toolbox of Fiji. The final segmentation masks were  
313 generated through subsequent morphological operations of images and connected  
314 domain extraction implemented with customized MATLAB scripts.



315 **Performance metrics.** Two types of metrics were used for quantitative evaluation of  
316 the spatial and temporal performance of DeepCAD. For synthetic calcium imaging data,  
317 corresponding clean images and ground-truth calcium traces were available. SNR and  
318 PSNR were used as the spatial metric to evaluate pixel-level similarity between  
319 DeepCAD enhanced images and ground-truth images. Pearson correlation coefficient  
320 ( $R$ ) was used as the temporal metric to reflect the similarity between enhanced traces  
321 and ground-truth traces. The Pearson correlation between signal  $x$  and the reference  
322 signal  $y$  is defined as

$$323 \quad R = \frac{E[(x - \mu_x)(y - \mu_y)]}{\sigma_x \sigma_y}$$

324 where  $\mu_x$  and  $\mu_y$  are the mean values of signal  $x$  and  $y$ , respectively;  $\sigma_x$  and  $\sigma_y$  are the  
325 standard deviations of signal  $x$  and  $y$ , respectively;  $E$  represents arithmetic mean.

326 Furthermore, we also evaluated the performance of DeepCAD based on more  
327 complex downstream tasks such as neuron extraction and spike inference, which are  
328 the most crucial prerequisites in functional analysis of neural circuits from calcium  
329 imaging data. We considered neuron extraction as an instance segmentation problem  
330 and adopted an object-level metric to evaluate segmentation performance<sup>28</sup>. Different  
331 intersection-over-union (IoU, defined as the intersection area divided by the union area  
332 of two objects) thresholds were selected to determine correctly segmented objects. For  
333 a specified IoU threshold, the segmentation accuracy (F1 score) was defined as the  
334 harmonic mean of sensitivity and precision, which can be formulated as

335 
$$F1 = \frac{2TP}{2TP + FP + FN} .$$

336 Here, TP, FP, and FN are the number of true positives, false positives, and false  
337 negatives, respectively. When applied CNMF as the source extraction method, the SNR  
338 of calcium traces was quantified with the peak SNR automatically calculated by the  
339 CaImAn toolbox<sup>29</sup> with infinite outliers eliminated. For spike inference, we used the  
340 error rate (ER) to quantify the performance of spike inference, which is defined as ER  
341 = 1- F1. Spikes detected from simultaneous electrophysiological recordings were used  
342 as the ground truth for ER calculation. The evaluation process was implemented with  
343 customized MATLAB scripts. SNR, PSNR, Pearson correlation coefficient, and IoU  
344 were computed using built-in functions.

#### 345 **Data availability**

346 Our data will be made publicly available post peer-review.

#### 347 **Code availability**

348 Our python code and Fiji plugin will be made publicly available post peer-review.

#### 349 **Acknowledgements**

350 We would like to acknowledge Y. Tang and Y. Yang at the School of Medicine of Tsinghua  
351 University for providing transgenic mice for imaging and the mesoscope imaging data for  
352 cross-system validation. We thank the Svoboda lab at Janelia Research Campus for releasing

353 their data of simultaneous electrophysiology and two-photon recording. This work was  
354 supported by the National Natural Science Foundation of China (62088102, 61831014,  
355 61531014 and 6181001011) and the Shenzhen Science and Technology Project under Grant  
356 (ZDYBH201900000002 and JCYJ20180508152042002).

### 357 **Author Contributions**

358 Q. D., H. W., L. F. and XY. L. conceived this project. Q. D., H. W. and L. F. supervised this  
359 research. XY. L. and G. Z. designed detailed implementations and processed the data. XY. L.  
360 designed and set up the imaging system. XY. L. and G. Z. conducted the experiments. G. Z.  
361 developed the python code and the Fiji plugin. J. W., Y. Z., and X. L. directed the experiments  
362 and data analysis. L. F., Y. Z., Z. Z., H. Q. and H. X. gave critical support on system setup and  
363 imaging procedure. J. W., L. F., Y. Z., X. L., H. Q., H. X., H. W. and Q. D. gave critical  
364 discussions on the results. All authors participated in the writing of the paper.

## 365 **References**

- 366 1. Grienberger, C. & Konnerth, A. Imaging Calcium in Neurons. *Neuron* **73**, 862-  
367 885 (2012).
- 368 2. Lu, R. et al. Video-rate volumetric functional imaging of the brain at synaptic  
369 resolution. *Nat. Neurosci.* **20**, 620-628 (2017).
- 370 3. Weisenburger, S. et al. Volumetric Ca(2+) Imaging in the Mouse Brain Using  
371 Hybrid Multiplexed Sculpted Light Microscopy. *Cell* **177**, 1050-1066 e1014  
372 (2019).
- 373 4. Chow, D.M. et al. Deep three-photon imaging of the brain in intact adult  
374 zebrafish. *Nat. Methods* **17**, 605-608 (2020).
- 375 5. Calarco, J.A. & Samuel, A.D. Imaging whole nervous systems: insights into  
376 behavior from worms to fish. *Nat. methods* **16**, 14-15 (2019).
- 377 6. Sabatini, B.L., Oertner, T.G. & Svoboda, K. The Life Cycle of Ca<sup>2+</sup> Ions in  
378 Dendritic Spines. *Neuron* **33**, 439-452 (2002).
- 379 7. Chen, T.W. et al. Ultrasensitive fluorescent proteins for imaging neuronal  
380 activity. *Nature* **499**, 295-300 (2013).
- 381 8. Ji, N., Freeman, J. & Smith, S.L. Technologies for imaging neural activity in  
382 large volumes. *Nat. Neurosci.* **19**, 1154-1164 (2016).
- 383 9. Svoboda, K. & Yasuda, R. Principles of two-photon excitation microscopy and  
384 its applications to neuroscience. *Neuron* **50**, 823-839 (2006).
- 385 10. Skylaki, S., Hilsenbeck, O. & Schroeder, T. Challenges in long-term imaging  
386 and quantification of single-cell dynamics. *Nat. Biotechnol.* **34**, 1137-1144  
387 (2016).
- 388 11. Podgorski, K. & Ranganathan, G. Brain heating induced by near-infrared lasers  
389 during multiphoton microscopy. *J. Neurophysiol.* **116**, 1012-1023 (2016).
- 390 12. Wang, T. et al. Quantitative analysis of 1300-nm three-photon calcium imaging  
391 in the mouse brain. *eLife* **9** (2020).
- 392 13. Dana, H. et al. High-performance calcium sensors for imaging activity in  
393 neuronal populations and microcompartments. *Nat. Methods* **16**, 649-657  
394 (2019).
- 395 14. Samantaray, N., Ruo-Berchera, I., Meda, A. & Genovese, M. Realization of the  
396 first sub-shot-noise wide field microscope. *Light Sci. Appl.* **6**, e17005 (2017).
- 397 15. Weigert, M. et al. Content-aware image restoration: pushing the limits of  
398 fluorescence microscopy. *Nat. Methods* **15**, 1090-1097 (2018).
- 399 16. Belthangady, C. & Royer, L.A. Applications, promises, and pitfalls of deep  
400 learning for fluorescence image reconstruction. *Nat. Methods* **16**, 1215-1225  
401 (2019).
- 402 17. Wang, H. et al. Deep learning enables cross-modality super-resolution in  
403 fluorescence microscopy. *Nat. Methods* **16**, 103-110 (2019).
- 404 18. Ouyang, W. et al. Deep learning massively accelerates super-resolution  
405 localization microscopy. *Nat. Biotechnol.* **36**, 460-468 (2018).

- 406 19. Lehtinen, J. et al. Noise2Noise: Learning Image Restoration without Clean Data.  
407 In *Proc. 35th International Conference on Machine Learning* (eds Dy, J. &  
408 Krause, A.) 2965–2974 (PMLR, 2018).
- 409 20. Çiçek, Ö. et al. 3D U-Net: learning dense volumetric segmentation from sparse  
410 annotation. In *Medical Image Computing and Computer-Assisted Intervention*  
411 424–432 (2016).
- 412 21. Pnevmatikakis, E.A. et al. Simultaneous Denoising, Deconvolution, and  
413 Demixing of Calcium Imaging Data. *Neuron* **89**, 285-299 (2016).
- 414 22. Wu, Y. & He, K. Group normalization. In *2018 IEEE European Conference on*  
415 *Computer Vision (ECCV)* 3–19 (IEEE, 2018).
- 416 23. Kingma, D. P. & Ba, J. L. Adam: a method for stochastic optimization. In  
417 *International Conference on Learning Representations* 1–15 (2015).
- 418 24. Deneux, T. et al. Accurate spike estimation from noisy calcium signals for  
419 ultrafast three-dimensional imaging of large neuronal populations in vivo. *Nat.*  
420 *Commun.* **7**, 12190 (2016).
- 421 25. GENIE project, Janelia Farm Campus, HHMI; Karel Svoboda (contact). (2015).  
422 Simultaneous imaging and loose-seal cell-attached electrical recordings from  
423 neurons expressing a variety of genetically encoded calcium indicators.  
424 CRCNS.org. <http://dx.doi.org/10.6080/K02R3PMN>
- 425 26. Berens, P. et al. Community-based benchmarking improves spike rate inference  
426 from two-photon calcium imaging data. *PLoS Comput. Biol.* **14**, e1006157  
427 (2018).
- 428 27. Pnevmatikakis, E.A. & Giovannucci, A. NoRMCorre: An online algorithm for  
429 piecewise rigid motion correction of calcium imaging data. *J. Neurosci.*  
430 *Methods* **291**, 83-94 (2017).
- 431 28. Caicedo, J.C. et al. Nucleus segmentation across imaging experiments: the 2018  
432 Data Science Bowl. *Nat. Methods* **16**, 1247-1253 (2019).
- 433 29. Giovannucci, A. et al. CaImAn an open source tool for scalable calcium imaging  
434 data analysis. *eLife* **8** (2019).

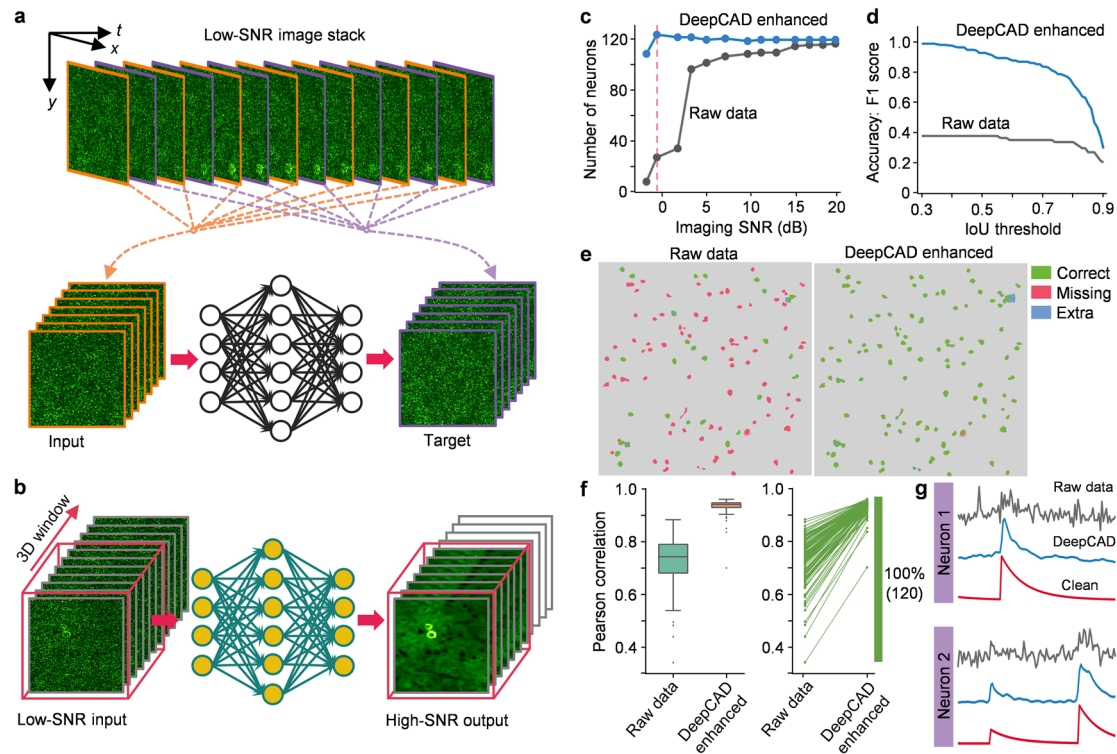

435

436 **Fig. 1 | General principle and validation of DeepCAD.** **a**, Self-supervised training  
 437 strategy of DeepCAD. Consecutive frames in the original low-SNR stack are divided  
 438 into two sub-stacks, used as the input volume and corresponding target volume to train  
 439 a deep neural network (3D U-Net). After training, a denoising model can be established  
 440 and memorized in network parameters. **b**, Application of the DeepCAD model. For  
 441 subsequent acquisitions, a 3D ( $x$ - $y$ - $t$ ) window traverses the entire stack and 3D tiles are  
 442 sequentially fed into the pre-trained model. Denoised recordings will be obtained after  
 443 the processing of the model. **c**, The number of neurons extracted under different  
 444 imaging SNRs before and after the enhancement of DeepCAD.  $N=120$  active neurons  
 445 were simulated in the field of view (FOV). **d**, Accuracy of neuron segmentation  
 446 quantified with F1 score at different intersection-over-union (IoU) thresholds (imaging  
 447 SNR=-0.7 dB, indicated by the red dashed line in **c**). **e**, Spatial profiles of extracted  
 448 neurons (imaging SNR=-0.7 dB). Correctly segmented regions (true positive) are  
 449 colored green. Missing (false negative) and extra regions (false positive) are colored  
 450 red and blue, respectively. Neuron extraction was implemented with CNMF<sup>21</sup>. **f**, Left:  
 451 boxplot showing the distribution of Pearson correlation coefficients with clean traces  
 452 before and after denoising ( $N=120$ ). Right: increases of trace correlations. Each line  
 453 represents one of 120 calcium traces and correlation coefficients of all neurons were  
 454 observed improved. **g**, Calcium transients indiscernible from noise (gray) can be  
 455 restored by DeepCAD (blue). Traces without noise contamination (red) serve as the  
 456 ground truth for comparison.

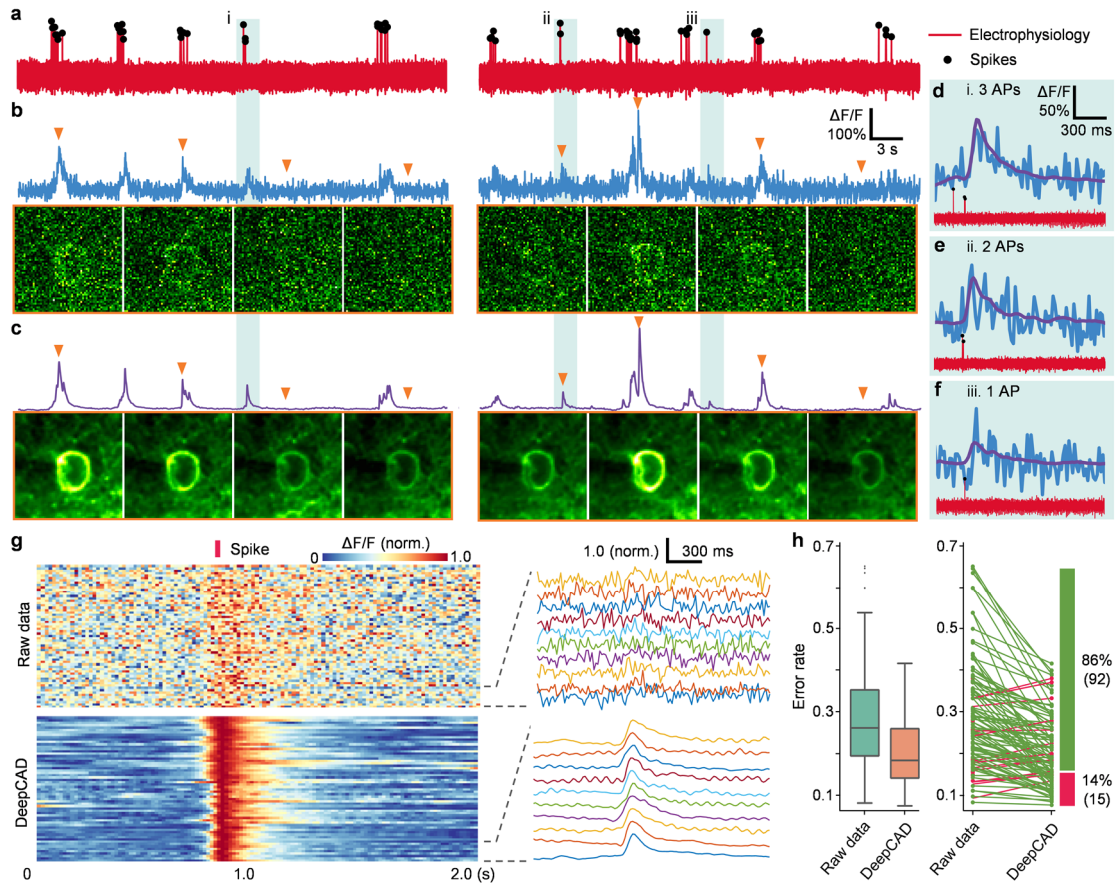

457

458 **Fig. 2 | Spatiotemporal enhancement of DeepCAD.** a, Electrophysiological  
 459 recordings of neural activities from a single neuron. Detected spikes are marked with  
 460 black dots. b, Two-photon calcium imaging of the same neuron synchronized with cell-  
 461 attached electrophysiology. Both spatial footprints and temporal traces of the neuron  
 462 were severely corrupted in detection noise. Representative frames indicated with  
 463 orange triangles are presented below the trace. c, Fluorescence traces and representative  
 464 frames after the enhancement of DeepCAD. d-f, The most imperceptible calcium  
 465 transients evoked by three APs (d), two APs (e), and one AP (f) can be resolved and  
 466 still keep their original dynamics noise removal. g, Calcium fluctuations evoked by 61  
 467 isolated action potentials. All spikes were normalized and temporally aligned with the  
 468 red bar. Zoom-in traces are shown in the right panel. h, Left: Boxplot showing the  
 469 distribution of error rates (lower is better) of spike inference for calcium traces extracted  
 470 from enhanced data compared with those extracted from the original data (N=107).  
 471 Real spike timings were revealed by simultaneous cell-attached recordings. Right:  
 472 decreases of the error rate of spike inference. Each line represents one of 107 recordings,  
 473 using green for decreased error rates and red for increased error rates.

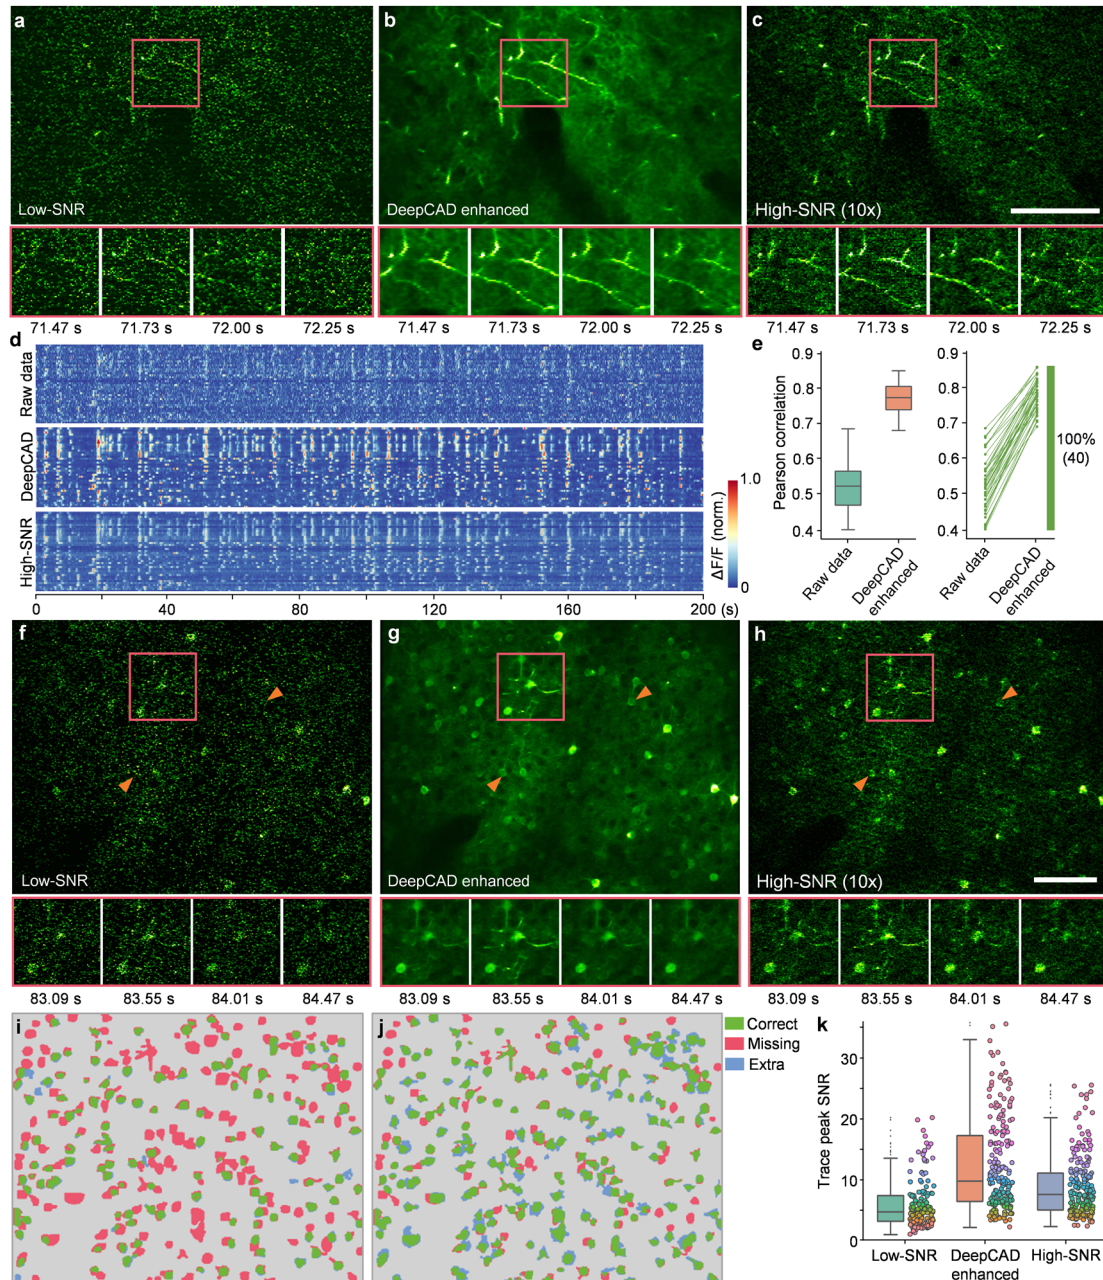

474

475 **Fig. 3 | DeepCAD reinforces the recording of large neuronal populations.** a,  
 476 Spontaneous neuropil activities in layer 1 of the mouse cortex captured by the low-SNR  
 477 detection path. b, Images restored from the low-SNR recording using DeepCAD. c,  
 478 Synchronized recording acquired by the high-SNR detection path (10-fold imaging  
 479 SNR). Magnified views of the boxed regions show calcium transients in a ~0.8 s time  
 480 window. Scale bar 100  $\mu\text{m}$ . d, Fluorescence traces extracted from 40 dendritic pixels.  
 481 Top: low-SNR recording, Middle: DeepCAD enhanced recording, Bottom: high-SNR  
 482 recording. e, Pearson correlation coefficients of single-pixel calcium traces before and  
 483 after denoising (left). High-SNR traces were used as the reference for correlation  
 484 calculation. Improvements were observed in all 40 traces (right). f, Low-SNR recording  
 485 of somatic signals in cortical layer 2/3. g, DeepCAD enhanced recording. h,  
 486 Synchronized high-SNR recording (10-fold imaging SNR). Orange arrows point to two



487 neurons. Magnified views of the boxed regions show calcium transients in a  $\sim 1.4$  s time  
488 window. Scale bar 100  $\mu\text{m}$ . **i**, Neurons extracted from the original low-SNR recording  
489 (N=150). **j**, Neurons extracted from the DeepCAD enhanced recording (N=229).  
490 Manual annotations served as the ground truth. Correctly segmented regions (true  
491 positive) are colored green. Missing (false negative) and extra regions (false positive)  
492 are colored red and blue, respectively. **k**, Distribution of peak SNRs of extracted  
493 calcium traces. CNMF was used for source extraction and peak SNR estimation.
